# Supplementary material
Source: MDPI journal article supplement (https://www.mdpi.com/2073-4441/13/17/2428)
Supplement: s1 [file s1]

## Article

# Hydrochemical Assessment of the Irrigation Water Quality of the El-Salam Canal, Egypt

Yasser A. El-Amier <sup>1,\*</sup>, Wafaa K. Kotb <sup>1</sup>, Giuliano Bonanomi <sup>2,3</sup>, Hala Fakhry <sup>4</sup>, Najat A. Marraiki <sup>5</sup>  
and Ahmed M. Abd-ElGawad <sup>1,6,\*</sup>

<sup>1</sup> Department of Botany, Faculty of Science, Mansoura University, Mansoura 35516, Egypt; w.moataz@gmail.com

<sup>2</sup> Department of Agricultural Sciences, University of Naples Federico II, Via Università 100, 80055 Portici, Italy; giuliano.bonanomi@unina.it

<sup>3</sup> Task Force on Microbiome Studies, University of Naples Federico II, 80131 Naples, Italy

<sup>4</sup> City of Scientific Research and Technological Applications (SRTA-City), New Borg El-Arab City 21934, Egypt; halaelhossany@gmail.com

<sup>5</sup> Department of Botany & Microbiology, College of Science, King Saud University, P.O. Box 2460, Riyadh 11451, Saudi Arabia; najat@ksu.edu.sa

<sup>6</sup> Plant Production Department, College of Food & Agriculture Sciences, King Saud University, P.O. Box 2460, Riyadh 11451, Saudi Arabia

\* Correspondence: yasran@mans.edu.eg (Y.A.E.-A.); aibrahim2@ksu.edu.sa (A.M.A.-E.); Tel.: +20-10-1722-9120 (Y.A.E.-A.); +96-65-6268-0864 (A.M.A.-E.)

**Citation:** El-Amier, Y.A.; Kotb, W.K.; Bonanomi, G.; Fakhry, H.; Marraiki, N.A.; Abd-ElGawad, A.M. Hydrochemical Assessment of the Irrigation Water Quality of the El-Salam Canal, Egypt. *Water* **2021**, *13*, 2428. <https://doi.org/10.3390/w13172428>

Academic Editors: Thomas Meixner, Sheng-Wei Wang and Chihhao Fan

Received: 5 August 2021

Accepted: 31 August 2021

Published: 3 September 2021

**Publisher's Note:** MDPI stays neutral with regard to jurisdictional claims in published maps and institutional affiliations.

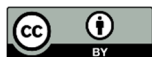

**Copyright:** © 2021 by the authors. Licensee MDPI, Basel, Switzerland. This article is an open access article distributed under the terms and conditions of the Creative Commons Attribution (CC BY) license (<http://creativecommons.org/licenses/by/4.0/>).

## Supplementary Materials

**Table S1.** Factors used in calculating Irrigation Water Quality Index in water samples collected from different sites (S1–S5) along the El-Salam Canal.

| Water Parameters | V(standard) | V(ideal) | Weight (Wi) | Relative Weight (Rwi) | Stations |        |        |        |        |
|------------------|-------------|----------|-------------|-----------------------|----------|--------|--------|--------|--------|
|                  |             |          |             |                       | S1       | S2     | S3     | S4     | S5     |
| pH               | 8.4         | 7        | 0.12        | 0.15                  | 58.57    | 67.14  | 80     | 101.43 | 55.71  |
| EC               | 3           | 0        | 0.33        | 0.43                  | 24       | 32.33  | 74.67  | 78     | 70     |
| HCO <sub>3</sub> | 518.6       | 0        | 0           | 0                     | 23.67    | 37.07  | 39.71  | 66.78  | 60.89  |
| Cl               | 354.5       | 0        | 0           | 0                     | 15.39    | 19.05  | 20.71  | 37     | 67.71  |
| SAR              | 9           | 0        | 0.11        | 0.14                  | 84.10    | 145.08 | 176.1  | 351.55 | 290.67 |
| PI               | 25          | 0        | 0.04        | 0.05                  | 131.54   | 170.31 | 183.22 | 241.08 | 206.74 |
| MH               | 50          | 0        | 0.02        | 0.03                  | 72.28    | 82.38  | 82.87  | 59.81  | 71.94  |
| Fe               | 5000        | 0        | 0           | 0.00                  | 0.02     | 0.03   | 0.04   | 0.03   | 0.03   |
| Mn               | 200         | 0        | 0.01        | 0.01                  | 0.34     | 0.98   | 0.89   | 0.48   | 1.5    |
| Cu               | 200         | 0        | 0.01        | 0.01                  | 1.17     | 2.52   | 3.22   | 2.06   | 2.44   |
| Zn               | 2000        | 0        | 0           | 0                     | 0.01     | 0      | 0.02   | 0.01   | 0.02   |
| Ni               | 200         | 0        | 0.01        | 0.01                  | 0.14     | 0.72   | 0.86   | 1.02   | 0.76   |
| Cd               | 10          | 0        | 0.10        | 0.13                  | 0.51     | 0.87   | 2.24   | 4.79   | 20.7   |
| Co               | 50          | 0        | 0.02        | 0.03                  | 0.71     | 6.94   | 9.35   | 11.19  | 8.07   |
| Cr               | 100         | 0        | 0.01        | 0.01                  | 0.18     | 0.88   | 1.02   | 1.47   | 0.77   |
| Pb               | 5000        | 0        | 0           | 0                     | 0.09     | 0.15   | 0.13   | 0.11   | 0.1    |

EC: Electric conductivity, SAR: sodium adsorption ratio, PI: Permeability Index, MH: magnesium hazard.

**Table S2.** Pearson's correlation matrix various water parameters and heavy metals from five sites along El-Salam Canal, Egypt.

|                  |        |         |         |        |        |         |        |        |                 |                 |                  |        |       |        |       |         |        |       |       |  |  |
|------------------|--------|---------|---------|--------|--------|---------|--------|--------|-----------------|-----------------|------------------|--------|-------|--------|-------|---------|--------|-------|-------|--|--|
|                  | pH     |         |         |        |        |         |        |        |                 |                 |                  |        |       |        |       |         |        |       |       |  |  |
| EC               | 0.583  | EC      |         |        |        |         |        |        |                 |                 |                  |        |       |        |       |         |        |       |       |  |  |
| TDS              | 0.688  | 0.802   | TDS     |        |        |         |        |        |                 |                 |                  |        |       |        |       |         |        |       |       |  |  |
| Na               | 0.428  | 0.984** | 0.604   | Na     |        |         |        |        |                 |                 |                  |        |       |        |       |         |        |       |       |  |  |
| K                | 0.309  | 0.940*  | 0.767   | 0.753  | K      |         |        |        |                 |                 |                  |        |       |        |       |         |        |       |       |  |  |
| Ca               | 0.097  | 0.692   | 0.404   | 0.939* | 0.737  | Ca      |        |        |                 |                 |                  |        |       |        |       |         |        |       |       |  |  |
| Mg               | -0.276 | 0.551   | 0.416   | 0.594  | 0.787  | 0.764   | Mg     |        |                 |                 |                  |        |       |        |       |         |        |       |       |  |  |
| Cl               | -0.147 | 0.860*  | 0.255   | 0.828  | 0.678  | 0.970** | 0.845  | Cl     |                 |                 |                  |        |       |        |       |         |        |       |       |  |  |
| SO <sub>4</sub>  | 0.274  | 0.871*  | 0.682   | 0.948* | 0.877  | 0.941*  | 0.804  | 0.877  | SO <sub>4</sub> |                 |                  |        |       |        |       |         |        |       |       |  |  |
| CO <sub>3</sub>  | 0.300  | 0.249   | 0.547   | -0.292 | 0.285  | -0.419  | 0.008  | -0.459 | -0.112          | CO <sub>3</sub> |                  |        |       |        |       |         |        |       |       |  |  |
| HCO <sub>3</sub> | 0.497  | 0.809   | 0.680   | .992** | 0.750  | 0.900*  | 0.566  | 0.774  | 0.944*          | -0.22           | HCO <sub>3</sub> |        |       |        |       |         |        |       |       |  |  |
| Fe               | 0.632  | 0.718   | 0.980** | 0.440  | 0.708  | 0.245   | 0.372  | 0.116  | 0.557           | 0.696           | 0.524            | Fe     |       |        |       |         |        |       |       |  |  |
| Mn               | -0.439 | 0.318   | 0.324   | 0.381  | 0.613  | 0.579   | 0.953* | 0.704  | 0.637           | 0.075           | 0.367            | 0.323  | Mn    |        |       |         |        |       |       |  |  |
| Pb               | 0.077  | -0.14   | 0.444   | -0.299 | -0.021 | -0.390  | 0.041  | -0.383 | -0.113          | 0.695           | -0.194           | 0.577  | 0.257 | Pb     |       |         |        |       |       |  |  |
| Cu               | 0.219  | 0.487   | 0.800   | 0.217  | 0.722  | 0.166   | 0.577  | 0.146  | 0.460           | 0.800           | 0.275            | 0.877  | 0.593 | 0.631  | Cu    |         |        |       |       |  |  |
| Co               | 0.700  | 0.769   | 0.980** | 0.748  | 0.816  | 0.558   | 0.469  | 0.401  | 0.791           | 0.384           | 0.809            | 0.922* | 0.334 | 0.283  | 0.707 | Co      |        |       |       |  |  |
| Ni               | 0.685  | 0.728   | 0.985** | 0.724  | 0.786  | 0.533   | 0.465  | 0.381  | 0.776           | 0.394           | 0.792            | 0.932* | 0.351 | 0.348  | 0.718 | 0.997** | Ni     |       |       |  |  |
| Cr               | 0.853  | 0.665   | 0.938*  | 0.687  | 0.631  | 0.426   | 0.213  | 0.226  | 0.655           | 0.333           | 0.764            | 0.872  | 0.081 | 0.285  | 0.545 | 0.957*  | 0.958* | Cr    |       |  |  |
| Cd               | -0.325 | 0.368   | 0.143   | 0.703  | 0.638  | 0.903*  | 0.886* | .979** | 0.795           | -0.432          | 0.637            | 0.028  | 0.775 | -0.373 | 0.157 | 0.273   | 0.253  | 0.063 | Cd    |  |  |
| Zn               | -0.148 | 0.547   | 0.135   | 0.514  | 0.731  | 0.668   | 0.681  | 0.708  | 0.592           | -0.104          | 0.429            | 0.065  | 0.48  | -0.566 | 0.243 | 0.234   | 0.173  | 0.012 | 0.755 |  |  |

Values in bold are significance at  $p \leq 0.05$ . EC: electric conductivity, TDS: total dissolved salts. Bold values showed the significant correlation.
